# Supplementary material
Source: publisher figshare collection journal article supplement (https://acs.figshare.com/ndownloader/files/4069672)

## SUPPORTING INFORMATION

### Palladium-Catalyzed Direct Alpha Arylation of Methyl Sulfones with Aryl Bromides

Bing Zheng,<sup>a,b</sup> Tiezheng Jia,<sup>b</sup> Patrick J. Walsh<sup>\*,b</sup>

<sup>a</sup> Department of Applied Chemistry, China Agricultural University, Beijing 100193, P. R. China. <sup>b</sup>Roy and Diana Vagelos Laboratories, Penn/Merck Laboratory for High-Throughput Experimentation, Department of Chemistry, University of Pennsylvania, 231 South 34th Street, Philadelphia, Pennsylvania 19104-6323, United States.

pwalsh@sas.upenn.edu

#### TABLE OF CONTENTS

|                                                                                               |     |
|-----------------------------------------------------------------------------------------------|-----|
| 1. General Methods . . . . .                                                                  | S2  |
| 2. Preparation of Sulfones . . . . .                                                          | S2  |
| 3. Procedure and Characterization for the Pd-Catalyzed arylation of Methyl sulfones . . . . . | S4  |
| 4. References . . . . .                                                                       | S21 |
| 5. NMR Spectra . . . . .                                                                      | S22 |

**General Methods.** All reactions were carried out under an atmosphere of dry nitrogen. Anhydrous CPME, dioxane, and 2-MeTHF were purchased from Sigma-Aldrich and used as solvent without purification, Toluene was dried through activated alumina columns. Unless otherwise stated, reagents were commercially available and used as purchased. Chemicals were obtained from Sigma-Aldrich, Acros, or Matrix Scientific, and solvents were purchased from Fisher Scientific. Flash chromatography was performed with Silica gel (230–400 mesh, Silicycle). The NMR spectra were obtained using a Bruker 500 MHz Fourier-transform NMR spectrometer. The infrared spectra were obtained with KBr plates using a Perkin-Elmer Spectrum 1600 Series spectrometer. High resolution mass spectrometry (HRMS) data were obtained on a Waters LC-TOF mass spectrometer (model LCT-XE Premier) using chemical ionization (CI) or electrospray ionization (ESI) in positive or negative mode, depending on the analyte. Melting points were determined on a Unimelt Thomas-Hoover melting point apparatus and are uncorrected.

#### **Preparation of Sulfones.**

Sulfones were prepared according to literature procedures.<sup>1,2</sup>

**1-Methyl-2-(methylsulfonyl)benzene:** <sup>1</sup>H NMR (500 MHz, CDCl<sub>3</sub>): δ 8.04 (d, *J* = 8.0 Hz, 1H), 7.54–7.51 (m, 1H), 7.40–7.27 (m, 2H), 3.08 (s, 3H), 2.72 (s, 3H) ppm. This data matches the reported spectral data.<sup>3</sup>

**1-Methoxy-3-(methylsulfonyl)benzene:** <sup>1</sup>H NMR (500 MHz, CDCl<sub>3</sub>): δ 7.52–7.43 (m, 3H), 7.18–7.16 (m, 1H), 3.87 (s, 3H), 3.07 (s, 3H) ppm. This data matches the reported spectral data.<sup>4</sup>

**1-Methoxy-4-(methylsulfonyl)benzene:** <sup>1</sup>H NMR (500 MHz, CDCl<sub>3</sub>): δ 7.88–7.85 (m, 2H), 7.04–7.01 (m, 2H), 3.89 (s, 3H), 3.03 (s, 3H) ppm. This data matches the reported spectral data.<sup>5</sup>

**1-Fluoro-4-(methylsulfonyl)benzene:** <sup>1</sup>H NMR (500 MHz, CDCl<sub>3</sub>): δ 8.00–7.97 (m, 2H), 7.28–7.25 (m, 2H), 3.09 (s, 3H) ppm. This data matches the reported spectral data.<sup>6</sup>

**1-Chloro-4-(methylsulfonyl)benzene:** <sup>1</sup>H NMR (500 MHz, CDCl<sub>3</sub>): δ 7.89 (d, *J* = 8.5 Hz, 2H), 7.55 (d, *J* = 9.0 Hz, 2H), 3.08 (s, 3H) ppm. This data matches the reported spectral data.<sup>7</sup>

**1-(Methylsulfonyl)-4-(trifluoromethyl)benzene:** <sup>1</sup>H NMR (500 MHz, CDCl<sub>3</sub>): δ 8.11 (d, *J* = 8.0 Hz, 2H), 7.86 (d, *J* = 8.0 Hz, 2H), 3.10 (s, 3H) ppm. This data matches the reported spectral data.<sup>8</sup>

**1-(Methylsulfonyl)naphthalene:** <sup>1</sup>H NMR (500 MHz, CDCl<sub>3</sub>): δ 8.70 (d, *J* = 8.5 Hz, 1H), 8.31 (d, *J* = 7.5 Hz, 1H), 8.10 (d, *J* = 8.5 Hz, 1H), 7.95 (d, *J* = 8.0 Hz, 1H), 7.71–7.67 (m, 1H), 7.61–7.55 (m, 2H), 3.19 (s, 3H) ppm. This data matches the reported spectral data.<sup>9</sup>

**3-(Methylsulfonyl)pyridine:** <sup>1</sup>H NMR (500 MHz, CDCl<sub>3</sub>): δ 9.17 (d, *J* = 1.5 Hz, 1H), 8.91 (dd, *J* = 5.0 Hz, 1.5 Hz, 1H), 8.27–8.24 (m, 1H), 7.56–7.29 (m, 1H), 3.13 (s, 3H) ppm. This data matches the reported spectral data.<sup>3</sup>

**2-Methyl-2-(methylsulfonyl)propane:**  $^1\text{H}$  NMR (500 MHz,  $\text{CDCl}_3$ ):  $\delta$  2.82 (s, 3H), 1.43 (s, 9H) ppm. This data matches the reported spectral data.<sup>10</sup>

**(Methylsulfonyl)cyclohexane:**  $^1\text{H}$  NMR (500 MHz,  $\text{CDCl}_3$ ):  $\delta$  2.88–2.84 (m, 1H), 2.83 (s, 3H), 2.22–2.19 (m, 2H), 1.96–1.92 (m, 2H), 1.77–1.73 (m, 1H), 1.55–1.46 (m, 2H), 1.37–1.28 (m, 2H), 1.27–1.18 (m, 1H) ppm. This data matches the reported spectral data.<sup>11</sup>

### Procedure and Characterization for the Pd-Catalyzed Arylation of Alkylsulfones.

**General Procedure:** A flame-dried microwave vial equipped with a stir bar was charged with Pd(OAc)<sub>2</sub> (4.5 mg, 0.02 mmol) and ligand **L** (16.1 mg, 0.04 mmol) under a nitrogen atmosphere. The LiO<sup>t</sup>Bu (48.3 mg, 0.60 mmol, 3 equiv) was added to the reaction vial, followed by 1 mL dry toluene via syringe. After the catalyst solution stirred for 30 min at 25 °C, methyl phenyl sulfone (31.2 mg, 0.20 mmol, 1.0 equiv) was added to the mixture. The microwave vial was sealed and bromobenzene (42.4 μL, 0.40 mmol, 2.0 equiv) was added by syringe under nitrogen atmosphere. The reaction mixture was stirred until TLC indicated complete consumption of the starting sulfone. The reaction mixture was quenched with H<sub>2</sub>O (2 mL) and extracted with ethyl acetate (3 mL x 3). The organic layer was dried over anhydrous Na<sub>2</sub>SO<sub>4</sub> and the volatile materials were removed under reduced pressure. The resulting product was purified by flash column chromatography on silica gel to give purified product.

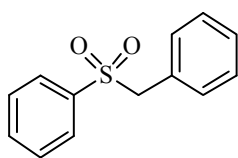

**(Benzylsulfonyl)benzene (3a):** The reaction was performed following the General Procedure with **1a** (31.2 mg, 0.20 mmol), LiO<sup>t</sup>Bu (48.3 mg, 0.60 mmol) and **2a** (42.4 μL, 0.40 mmol). The crude product was purified by flash chromatography on silica gel (eluted

with EtOAc:hexanes = 1:5) to give the product (39.9 mg, 86% yield) as a white solid; *R<sub>f</sub>* = 0.40 (hexanes:EtOAc = 4:1); <sup>1</sup>H NMR (500 MHz, CDCl<sub>3</sub>): δ 7.62–7.58 (m, 3H), 7.43 (t, *J* = 7.5 Hz, 2H), 7.31–7.29 (m, 1H), 7.25 (d, *J* = 8.0 Hz, 2H), 7.07 (d, *J* = 8.0 Hz, 2H), 4.31 (s, 2H) ppm; <sup>13</sup>C{<sup>1</sup>H} NMR (125 MHz, CDCl<sub>3</sub>): δ 137.8, 133.7, 130.8, 128.8, 128.7, 128.5, 128.5, 128.0, 62.8 ppm; These spectroscopic data correspond to previously reported data.<sup>7</sup>

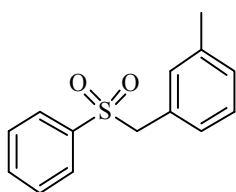

**1-Methyl-3-((phenylsulfonyl)methyl)benzene (3b):** The reaction was

performed following the General Procedure with **1a** (31.2 mg, 0.20 mmol), LiO<sup>t</sup>Bu (48.3 mg, 0.60 mmol) and **2b** (48.0 μL, 0.40 mmol). The crude material was purified by

flash chromatography on silica gel (eluted with EtOAc:hexanes = 1:5) to give the product (40.4 mg, 82% yield) as a white solid; *R<sub>f</sub>* = 0.42 (hexanes:EtOAc = 4:1); m.p. = 120–122 °C; <sup>1</sup>H NMR (500 MHz, CDCl<sub>3</sub>): δ 7.64 (d, *J* = 8.0 Hz, 2H), 7.61–7.58 (m, 1H), 7.45 (t, *J* = 7.5 Hz, 2H), 7.12 (d, *J* = 6.5 Hz, 2H), 6.90 (s, 1H), 6.84 (d, *J* = 6.0 Hz, 1H), 4.26 (s, 2H), 2.26 (s, 3H) ppm; <sup>13</sup>C{<sup>1</sup>H} NMR (125 MHz, CDCl<sub>3</sub>): δ 138.2, 137.9, 133.6, 131.5, 129.4, 128.8, 128.6, 128.3, 127.8, 127.8, 62.8, 21.2 ppm; IR (thin film): 3010, 2963, 2903, 2868, 1312, 1156, 1117, 777, 697 cm<sup>-1</sup>; HRMS calc'd for C<sub>14</sub>H<sub>15</sub>O<sub>2</sub>S<sup>+</sup> 247.0793, found 247.0790 [M+H]<sup>+</sup>.

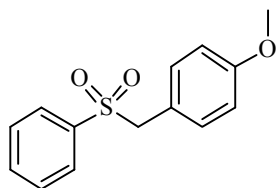

**1-Methoxy-4-((phenylsulfonyl)methyl)benzene (3c):** The reaction was performed following the General Procedure with **1a** (31.2 mg, 0.20 mmol), LiO<sup>t</sup>Bu (48.3 mg, 0.60 mmol) and **2c** (50.0  $\mu$ L, 0.40 mmol). The crude material was purified by flash chromatography on silica gel (eluted with EtOAc:hexanes = 1:3) to give the product (40.8 mg, 78% yield) as a white solid;  $R_f$  = 0.32 (hexanes:EtOAc = 4:1);  $^1\text{H}$  NMR (500 MHz,  $\text{CDCl}_3$ ):  $\delta$  7.64–7.63 (m, 3H), 7.59 (t,  $J$  = 7.5 Hz, 2H), 7.46 (t,  $J$  = 7.5 Hz, 2H), 7.00–6.98 (m, 2H), 6.78 (dd,  $J$  = 6.5 Hz, 2.0 Hz, 2H), 4.25 (s, 2H), 3.78 (s, 3H) ppm;  $^{13}\text{C}\{^1\text{H}\}$  NMR (125 MHz,  $\text{CDCl}_3$ ):  $\delta$  159.9, 137.8, 133.6, 131.9, 128.8, 128.6, 119.9, 113.9, 62.1, 55.2 ppm; These spectroscopic data correspond to previously reported data.<sup>12</sup>

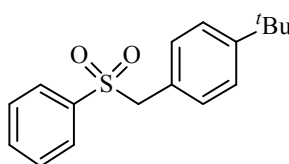

**1-(tert-Butyl)-4-((phenylsulfonyl)methyl)benzene (3d):** The reaction was performed following the General Procedure with **1a** (31.2 mg, 0.20 mmol), LiO<sup>t</sup>Bu (48.3 mg, 0.60 mmol) and **2d** (69.0  $\mu$ L, 0.40 mmol). The crude material was purified by flash chromatography on silica gel (eluted with EtOAc:hexanes = 1:4) to give the product (51.8 mg, 90% yield) as a white solid;  $R_f$  = 0.47 (hexanes:EtOAc = 4:1); m.p. = 162–165 °C;  $^1\text{H}$  NMR (500 MHz,  $\text{CDCl}_3$ ):  $\delta$  7.65 (dd,  $J$  = 8.5 Hz, 1.5 Hz, 2H), 7.61–7.58 (m, 1H), 7.46–7.42 (m, 2H), 7.29–7.27 (m, 2H), 7.03 (d,  $J$  = 8.0 Hz, 2H), 4.28 (s, 2H), 1.28 (s, 9H) ppm;  $^{13}\text{C}\{^1\text{H}\}$  NMR (125 MHz,  $\text{CDCl}_3$ ):  $\delta$  151.9, 138.1, 133.6, 130.5, 128.8, 128.5, 125.5, 124.8, 62.4, 34.5, 31.2 ppm; IR (thin film): 2962, 1447, 1290, 1147, 1136, 1084, 733, 598, 548  $\text{cm}^{-1}$ ; HRMS calc'd for  $\text{C}_{17}\text{H}_{20}\text{O}_2\text{NaS}^+$  311.1082, found 311.1089  $[\text{M}+\text{Na}]^+$ .

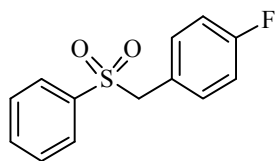

**1-Fluoro-4-((phenylsulfonyl)methyl)benzene (3e):** The reaction was performed following the General Procedure with **1a** (31.2 mg, 0.20 mmol), LiO<sup>t</sup>Bu (48.3 mg, 0.60 mmol) and **2e** (44.6  $\mu$ L, 0.40 mmol). The crude material was purified by flash chromatography on silica gel (eluted with EtOAc:hexanes = 1:4) to give the product (41.5 mg, 83% yield) as a white solid;  $R_f$  = 0.40 (hexanes:EtOAc = 4:1);  $^1\text{H}$  NMR (500 MHz,  $\text{CDCl}_3$ ):  $\delta$  7.62 (dd,  $J$  = 16.0 Hz, 8.0 Hz, 3H), 7.48–7.45 (m, 2H), 7.08–7.05 (m, 2H), 6.97–6.93 (m, 2H), 4.28 (s, 2H) ppm;  $^{13}\text{C}\{^1\text{H}\}$  NMR (125 MHz,  $\text{CDCl}_3$ ):  $\delta$  163.0 (d,  $J_{\text{C-F}}$  = 247 Hz), 137.6, 133.8, 132.5 (d,  $J_{\text{C-F}}$  = 8 Hz), 128.9, 128.5, 123.9 (d,  $J_{\text{C-F}}$  = 4 Hz), 115.6 (d,  $J$  = 22 Hz), 61.9 ppm; These spectroscopic data correspond to previously reported data.<sup>13</sup>

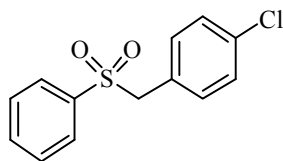

**1-Chloro-4-((phenylsulfonyl)methyl)benzene (3f):** The reaction was performed following the General Procedure with **1a** (31.2 mg, 0.20 mmol), LiO<sup>t</sup>Bu (48.3 mg, 0.60 mmol) and **2f** (76.0 mg, 0.40 mmol). The crude material was purified by flash

chromatography on silica gel (eluted with EtOAc:hexanes = 1:4) to give the product (43.1 mg, 81% yield) as a white solid;  $R_f$  = 0.42 (hexanes:EtOAc = 4:1);  $^1\text{H}$  NMR (500 MHz,  $\text{CDCl}_3$ ):  $\delta$  7.66–7.64 (m, 2H), 7.61 (d,  $J$  = 7.5 Hz, 1H), 7.48 (t,  $J$  = 7.5 Hz, 2H), 7.24 (d,  $J$  = 8.0 Hz, 2H), 7.02 (d,  $J$  = 8.5 Hz, 2H), 4.27 (s, 2H) ppm;  $^{13}\text{C}\{^1\text{H}\}$  NMR (125 MHz,  $\text{CDCl}_3$ ):  $\delta$  137.6, 135.0, 133.9, 132.0, 129.0, 128.8, 128.5, 126.6, 62.0 ppm; These spectroscopic data correspond to previously reported data.<sup>14</sup>

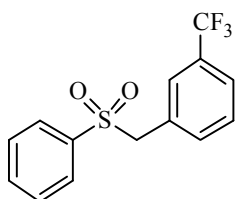

**1-((Phenylsulfonyl)methyl)-3-(trifluoromethyl)benzene (3g):** The reaction was performed following the General Procedure with **1a** (31.2 mg, 0.20 mmol), LiO<sup>t</sup>Bu (48.3 mg, 0.60 mmol) and **2g** (56.0  $\mu\text{L}$ , 0.40 mmol). The crude material was purified by flash

chromatography on silica gel (eluted with EtOAc:hexanes = 1:3) to give the product (48.0 mg, 80% yield) as a white solid;  $R_f$  = 0.42 (hexanes:EtOAc = 4:1); m.p. = 107–109 °C;  $^1\text{H}$  NMR (500 MHz,  $\text{CDCl}_3$ ):  $\delta$  7.64–7.61 (m, 3H), 7.57 (d,  $J$  = 7.5 Hz, 1H), 7.48–7.44 (m, 2H), 7.39 (dd,  $J$  = 19.0 Hz, 7.5 Hz, 2H), 7.21 (s, 1H), 4.36 (s, 2H) ppm;  $^{13}\text{C}\{^1\text{H}\}$  NMR (125 MHz,  $\text{CDCl}_3$ ):  $\delta$  137.3, 134.2, 134.0, 131.2, 130.7 (q,  $J_{\text{C-F}}$  = 33 Hz), 129.2, 129.1, 129.0, 128.5, 127.5, 127.4, 126.8, 125.5, 125.4, 124.6, 122.5, 120.3, 62.2 ppm; IR (thin film): 2951, 1449, 1334, 1309, 1142, 1119, 1073, 813, 701, 685, 544  $\text{cm}^{-1}$ ; HRMS calc'd for  $\text{C}_{14}\text{H}_{11}\text{O}_2\text{F}_3\text{NaS}^+$  322.0330, found 323.0345  $[\text{M}+\text{Na}]^+$ .

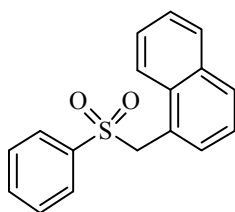

**1-((Phenylsulfonyl)methyl)naphthalene (3h):** The reaction was performed following the General Procedure with **1a** (31.2 mg, 0.20 mmol), LiO<sup>t</sup>Bu (48.3 mg, 0.60 mmol) and **2h** (56.0  $\mu\text{L}$ , 0.40 mmol). The crude material was purified by flash

chromatography on silica gel (eluted with EtOAc:hexanes = 1:3) to give the product (41.2 mg, 73% yield) as a white solid;  $R_f$  = 0.40 (hexanes:EtOAc = 4:1);  $^1\text{H}$  NMR (500 MHz,  $\text{CDCl}_3$ ):  $\delta$  7.78 (d,  $J$  = 1.5 Hz, 3H), 7.59–7.57 (m, 2H), 7.50–7.46 (m, 1H), 7.43–7.38 (m, 2H), 7.33–7.29 (m, 3H), 7.18 (d,  $J$  = 7.0 Hz, 1H), 4.79 (s, 2H) ppm;  $^{13}\text{C}\{^1\text{H}\}$  NMR (125 MHz,  $\text{CDCl}_3$ ):  $\delta$  137.9, 133.7, 133.6, 132.0, 130.6, 129.7, 128.8, 128.6, 126.6, 125.9, 125.0, 124.4, 123.5, 59.8 ppm; These spectroscopic data correspond to previously reported data.<sup>15</sup>

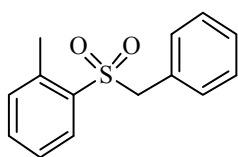

**1-(Benzylsulfonyl)-2-methylbenzene (4b):** The reaction was performed following the

General Procedure with **1b** (34.0 mg, 0.20 mmol), LiO<sup>t</sup>Bu (48.3 mg, 0.60 mmol) and

**2a** (42.4  $\mu$ L, 0.40 mmol). The crude material was purified by flash chromatography on

silica gel (eluted with EtOAc:hexanes = 1:4) to give the product (42.3 mg, 86% yield) as a white solid;  $R_f$  = 0.47 (hexanes:EtOAc = 4:1); m.p. = 90–93 °C;  $^1\text{H}$  NMR (500 MHz,  $\text{CDCl}_3$ ):  $\delta$  7.67 (d,  $J$  = 1.0 Hz, 1H), 7.45–7.42 (m, 1H), 7.27–7.18 (m, 5H), 7.05 (d,  $J$  = 7.5 Hz, 2H), 4.31 (s, 2H), 2.50 (s, 3H) ppm;  $^{13}\text{C}\{^1\text{H}\}$  NMR (125 MHz,  $\text{CDCl}_3$ ):  $\delta$  138.6, 135.9, 133.7, 132.4, 130.8, 130.7, 128.7, 128.5, 127.9, 126.4, 62.1, 20.3 ppm; IR (thin film): 3063, 1456, 1309, 1290, 1154, 1120, 763, 700, 526  $\text{cm}^{-1}$ ; HRMS calc'd for  $\text{C}_{14}\text{H}_{14}\text{O}_2\text{NaS}^+$  269.0612, found 269.0615  $[\text{M}+\text{Na}]^+$ .

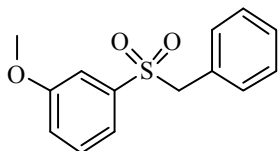

**1-(Benzylsulfonyl)-3-methoxybenzene (4c):** The reaction was performed following the

General Procedure with **1c** (37.2 mg, 0.20 mmol), LiO<sup>t</sup>Bu (48.3 mg, 0.60 mmol) and **2a**

(42.4  $\mu$ L, 0.40 mmol). The crude material was purified by flash chromatography on silica

gel (eluted with EtOAc:hexanes = 1:3) to give the product (44.5 mg, 85% yield) as a white solid;  $R_f$  = 0.42 (hexanes:EtOAc = 4:1); m.p. = 105–107 °C;  $^1\text{H}$  NMR (500 MHz,  $\text{CDCl}_3$ ):  $\delta$  7.36–7.30 (m, 2H), 7.27–7.24 (m, 3H), 7.11–7.09 (m, 3H), 7.02 (d,  $J$  = 1.5 Hz, 1H), 4.30 (s, 2H), 3.69 (s, 3H) ppm;  $^{13}\text{C}\{^1\text{H}\}$  NMR (125 MHz,  $\text{CDCl}_3$ ):  $\delta$  159.6, 138.8, 130.8, 129.9, 128.7, 128.5, 128.2, 120.7, 120.6, 112.7, 62.8, 55.5 ppm; IR (thin film): 1597, 1480, 1308, 1149, 780, 699, 512  $\text{cm}^{-1}$ ; HRMS calc'd for  $\text{C}_{14}\text{H}_{14}\text{O}_3\text{NaS}^+$  285.0561, found 285.0560  $[\text{M}+\text{Na}]^+$ .

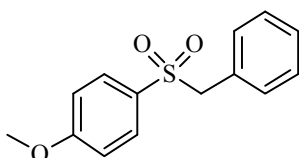

**1-(Benzylsulfonyl)-4-methoxybenzene (4d):** The reaction was performed following the

General Procedure with **1d** (37.2 mg, 0.20 mmol), LiO<sup>t</sup>Bu (48.3 mg, 0.60 mmol) and **2a**

(42.4  $\mu$ L, 0.40 mmol). The crude material was purified by flash chromatography on silica

gel (eluted with EtOAc:hexanes = 1:3) to give the product (42.5 mg, 81% yield) as a

white solid;  $R_f$  = 0.40 (hexanes:EtOAc = 4:1); m.p. = 112–114 °C;  $^1\text{H}$  NMR (500 MHz,  $\text{CDCl}_3$ ):  $\delta$  7.52–7.51 (m, 2H), 7.30–7.29 (m, 1H), 7.27–7.24 (m, 2H), 7.09–7.07 (m, 2H), 6.89–6.87 (m, 2H), 4.28 (s, 2H), 3.83 (s, 3H) ppm;  $^{13}\text{C}\{^1\text{H}\}$  NMR (125 MHz,  $\text{CDCl}_3$ ):  $\delta$  163.6, 130.8, 130.7, 129.3, 128.6, 128.5, 128.4, 114.0, 63.0, 55.6 ppm; These spectroscopic data correspond to previously reported data.<sup>16</sup>

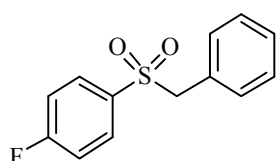

**1-(Benzylsulfonyl)-4-fluorobenzene (4e):** The reaction was performed following

the General Procedure with **1e** (34.8 mg, 0.20 mmol), LiO<sup>t</sup>Bu (48.3 mg, 0.60 mmol) and

**2a** (42.4  $\mu$ L, 0.40 mmol). The crude material was purified by flash chromatography on silica gel (eluted with EtOAc:hexanes = 1:5) to give the product (41.1 mg, 82% yield) as a white solid;  $R_f$  = 0.45 (hexanes:EtOAc = 4:1); m.p. = 152–154  $^{\circ}$ C;  $^1\text{H}$  NMR (500 MHz,  $\text{CDCl}_3$ ):  $\delta$  7.62–7.60 (m, 2H), 7.33–7.31 (m, 1H), 7.29–7.26 (m, 2H), 7.13–7.07 (m, 4H), 4.31 (s, 2H) ppm;  $^{13}\text{C}\{^1\text{H}\}$  NMR (125 MHz,  $\text{CDCl}_3$ ):  $\delta$  165.7 (d,  $J_{\text{C-F}}$  = 255 Hz), 133.7 (d,  $J_{\text{C-F}}$  = 3 Hz), 131.5, 131.4, 130.7, 128.8, 128.6, 127.9, 116.1 (d,  $J_{\text{C-F}}$  = 23 Hz), 62.9 ppm; IR (thin film): 2932, 1598, 1315, 1290, 1150, 1086, 845, 775, 696, 547, 509  $\text{cm}^{-1}$ ; HRMS calc'd for  $\text{C}_{13}\text{H}_{12}\text{O}_2\text{SF}^+$  251.0542, found 251.0548  $[\text{M}+\text{H}]^+$ .

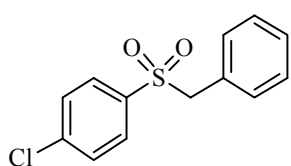

**1-(Benzylsulfonyl)-4-chlorobenzene (4f)**: The reaction was performed following the General Procedure with **1f** (38.0 mg, 0.20 mmol), LiO'Bu (48.3 mg, 0.60 mmol) and **2a** (42.4  $\mu$ L, 0.40 mmol). The crude material was purified by flash chromatography on silica gel (eluted with EtOAc:hexanes = 1:5) to give the product (43.1 mg, 81% yield) as a white solid;  $R_f$  = 0.53 (hexanes:EtOAc = 4:1);  $^1\text{H}$  NMR (500 MHz,  $\text{CDCl}_3$ ):  $\delta$  7.54–7.52 (m, 2H), 7.40–7.38 (m, 2H), 7.33–7.30 (m, 1H), 7.27–7.24 (m, 2H), 7.09–7.07 (m, 2H), 4.31 (s, 2H) ppm;  $^{13}\text{C}\{^1\text{H}\}$  NMR (125 MHz,  $\text{CDCl}_3$ ):  $\delta$  140.4, 136.2, 130.8, 130.1, 129.1, 128.9, 128.6, 127.8, 62.8 ppm; These spectroscopic data correspond to previously reported data.<sup>17</sup>

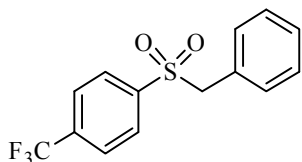

**1-(Benzylsulfonyl)-4-(trifluoromethyl)benzene (4g)**: The reaction was performed following the General Procedure with **1g** (44.8 mg, 0.20 mmol), LiO'Bu (48.3 mg, 0.60 mmol) and **2a** (42.4  $\mu$ L, 0.40 mmol). The crude material was purified by flash chromatography on silica gel (eluted with EtOAc:hexanes = 1:4) to give the product (50.4 mg, 84% yield) as a white solid;  $R_f$  = 0.53 (hexanes:EtOAc = 4:1);  $^1\text{H}$  NMR (500 MHz,  $\text{CDCl}_3$ ):  $\delta$  7.75 (d,  $J$  = 8.0 Hz, 2H), 7.70 (d,  $J$  = 8.5 Hz, 2H), 7.33 (d,  $J$  = 7.5 Hz, 1H), 7.27 (t,  $J$  = 7.5 Hz, 2H), 7.09 (d,  $J$  = 7.0 Hz, 2H), 4.35 (s, 2H) ppm;  $^{13}\text{C}\{^1\text{H}\}$  NMR (125 MHz,  $\text{CDCl}_3$ ):  $\delta$  141.3, 135.4 (q,  $J_{\text{C-F}}$  = 33 Hz), 134.9, 130.8, 129.3, 129.0, 128.7, 127.4, 126.3, 125.9 (q,  $J_{\text{C-F}}$  = 4 Hz), 124.1, 121.9, 119.8, 62.7 ppm; These spectroscopic data correspond to previously reported data.<sup>16</sup>

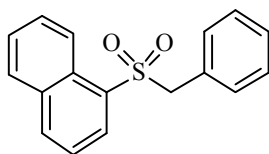

**1-(Benzylsulfonyl)naphthalene (4h)**: The reaction was performed following the General Procedure with **1h** (41.2 mg, 0.20 mmol), LiO'Bu (48.3 mg, 0.60 mmol) and **2a** (42.4  $\mu$ L, 0.40 mmol). The crude material was purified by flash



chromatography on silica gel (eluted with EtOAc:hexanes = 1:5) to give the product (46.8 mg, 83% yield) as a white solid;  $R_f$  = 0.32 (hexanes:EtOAc = 4:1); m.p. = 110–113 °C;  $^1\text{H}$  NMR (500 MHz,  $\text{CDCl}_3$ ):  $\delta$  8.77 (d,  $J$  = 8.5 Hz, 1H), 8.07 (d,  $J$  = 8.0 Hz, 1H), 7.97–7.94 (m, 2H), 7.70–7.66 (m, 1H), 7.63–7.60 (m, 1H), 7.43–7.40 (m, 1H), 7.25–7.21 (m, 1H), 7.16–7.13 (m, 2H), 6.94 (d,  $J$  = 8.0 Hz, 2H), 4.49 (s, 1H) ppm;  $^{13}\text{C}\{^1\text{H}\}$  NMR (125 MHz,  $\text{CDCl}_3$ ):  $\delta$  135.1, 133.9, 132.9, 131.4, 130.6, 129.2, 129.1, 128.6, 128.6, 128.4, 127.9, 126.9, 124.1, 124.0, 62.3 ppm; IR (thin film): 1507, 1456, 1312, 1156, 1117, 777, 698, 497  $\text{cm}^{-1}$ ; HRMS calc'd for  $\text{C}_{17}\text{H}_{15}\text{O}_2\text{S}^+$  283.0793, found 283.0782  $[\text{MH}]^+$ .

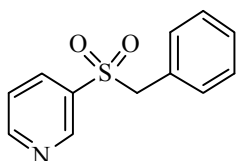

**3-(Benzylsulfonyl)pyridine (4i)**: The reaction was performed following the General Procedure with **1i** (31.4 mg, 0.20 mmol), LiO<sup>t</sup>Bu (48.3 mg, 0.60 mmol) and **2a** (42.4  $\mu\text{L}$ , 0.40 mmol). The crude material was purified by flash chromatography on silica gel (eluted

with EtOAc:hexanes = 1:4) to give the product (32.6 mg, 70% yield) as a white solid;  $R_f$  = 0.45 (hexanes:EtOAc = 4:1);  $^1\text{H}$  NMR (500 MHz,  $\text{CDCl}_3$ ):  $\delta$  8.80–8.79 (m, 2H), 7.85–7.83 (m, 1H), 7.39–7.32 (m, 2H), 7.29–7.26 (m, 2H), 7.10 (d,  $J$  = 7.5 Hz, 2H), 4.38 (s, 2H) ppm;  $^{13}\text{C}\{^1\text{H}\}$  NMR (125 MHz,  $\text{CDCl}_3$ ):  $\delta$  154.2, 149.4, 136.4, 134.1, 130.8, 129.1, 128.8, 127.4, 123.4, 63.1 ppm; These spectroscopic data correspond to previously reported data.<sup>17</sup>

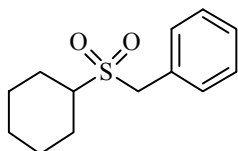

**((Cyclohexylsulfonyl)methyl)benzene (4j)**: The reaction was performed following the General Procedure with **1j** (32.4 mg, 0.20 mmol), LiO<sup>t</sup>Bu (48.3 mg, 0.60 mmol) and **2a** (42.4  $\mu\text{L}$ , 0.40 mmol). The crude material was purified by flash chromatography on silica

gel (eluted with EtOAc:hexanes = 1:3) to give the product (39.5 mg, 83% yield) as a white solid;  $R_f$  = 0.36 (hexanes:EtOAc = 4:1);  $^1\text{H}$  NMR (500 MHz,  $\text{CDCl}_3$ ):  $\delta$  7.41–7.37 (m, 5H), 4.18 (s, 2H), 2.77–2.70 (m, 1H), 2.12 (d,  $J$  = 12.5 Hz, 2H), 1.89 (dd,  $J$  = 9.5 Hz, 4.0 Hz, 2H), 1.69–1.67 (m, 1H), 1.61–1.53 (m, 2H), 1.26–1.20 (m, 3H) ppm;  $^{13}\text{C}\{^1\text{H}\}$  NMR (125 MHz,  $\text{CDCl}_3$ ):  $\delta$  130.6, 128.9, 128.7, 127.9, 59.2, 56.1, 25.0, 24.9 ppm; These spectroscopic data correspond to previously reported data.<sup>18</sup>

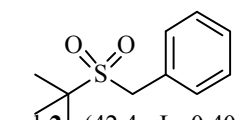

**((tert-Butylsulfonyl)methyl)benzene (4k)**: The reaction was performed following

the General Procedure with **1k** (27.2 mg, 0.20 mmol), LiO<sup>t</sup>Bu (48.3 mg, 0.60 mmol) and **2a** (42.4  $\mu\text{L}$ , 0.40 mmol). The crude material was purified by flash chromatography on silica gel (eluted with EtOAc:hexanes = 1:3) to give the product (35.6 mg, 84% yield) as a white solid;  $R_f$  = 0.4 (hexanes:EtOAc = 4:1);  $^1\text{H}$  NMR (500 MHz,  $\text{CDCl}_3$ ):  $\delta$  7.41–7.39 (m, 2H), 7.34–7.33 (m, 3H), 4.15 (s, 2H), 1.39 (s, 9H) ppm;  $^{13}\text{C}\{^1\text{H}\}$  NMR

(125 MHz, CDCl<sub>3</sub>):  $\delta$  131.2, 128.6, 127.3, 59.8, 52.7, 23.6 ppm;. These spectroscopic data correspond to previously reported data.<sup>19</sup>

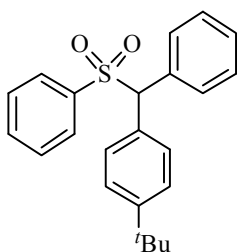

**1-(tert-Butyl)-4-(phenyl(phenylsulfonyl)methyl)benzene (5a):** The reaction was performed following the General Procedure with **3a** (46.4 mg, 0.20 mmol), KO<sup>t</sup>Bu (67.4 mg, 0.60 mmol) and **2d** (69.0  $\mu$ L, 0.40 mmol) in 1 mL dioxane. The crude material was purified by flash chromatography on silica gel (eluted with EtOAc:hexanes = 1:10) to give the product (59.0 mg, 81% yield) as a white solid;  $R_f$  = 0.5 (hexanes:EtOAc = 4:1); m.p. = 172–174 °C; <sup>1</sup>H

NMR (500 MHz, CDCl<sub>3</sub>):  $\delta$  7.61–7.59 (m, 2H), 7.52–7.47 (m, 5H), 7.35–7.32 (m, 4H), 7.29–7.28 (m, 3H), 5.26 (s, 1H), 1.28 (s, 9H) ppm; <sup>13</sup>C{<sup>1</sup>H} NMR (125 MHz, CDCl<sub>3</sub>):  $\delta$  151.7, 138.2, 133.3, 133.1, 129.9, 129.6, 129.5, 129.0, 128.6, 128.5, 128.4, 125.6, 76.2, 34.5, 31.2 ppm; IR (thin film): 2945, 1308, 1142, 1083 cm<sup>-1</sup>; HRMS calc'd for C<sub>23</sub>H<sub>24</sub>O<sub>2</sub>NaS<sup>+</sup> 387.1395, found 387.1394 [MNa]<sup>+</sup>.

## References.

- Parent, E. E.; Dence, C. S.; Jenks, C.; Sharp, T. L.; Welch, M. J.; Katzenellenbogen, J. A. *J. Med. Chem.* **2007**, *50*, 1028.
- Holland, H. L.; Brown, F. M.; Larsen, B. G. *Bioorg. Med. Chem.* **1994**, *2*, 647.
- Zhu, W.; Ma, D. *J. Org. Chem.* **2005**, *70*, 2696.
- Kropp, P. J.; Breton, G. W.; Fields, J. D.; Tung, J. C.; Loomis, B. R. *J. Am. Chem. Soc.* **2000**, *122*, 4280.
- Yang, H.; Li, Y.; Jiang, M.; Wang, J.; Fu, H. *Chem.-Eur. J.* **2011**, *17*, 5652.
- Tang, P.; Furuya, T.; Ritter, T. *J. Am. Chem. Soc.* **2010**, *132*, 12150.
- Fukuda, N.; Ikemoto, T. *J. Org. Chem.* **2010**, *75*, 4629.
- Baskin, J. M.; Wang, Z. *Org. Lett.* **2002**, *4*, 4423.
- Kar, A.; Sayyed, I. A.; Lo, W. F.; Kaiser, H. M.; Beller, M.; Tse, M. K. *Org. Lett.* **2007**, *9*, 3405.
- King, J. F.; Lam, J. Y. L.; Dave, V. *J. Org. Chem.* **1995**, *60*, 2831.
- Eliel, E. L.; Kandasamy, D. *J. Org. Chem.* **1976**, *41*, 3899.
- Liu, C.-R.; Li, M.-B.; Cheng, D.-J.; Yang, C.-F.; Tian, S.-K. *Org. Lett.* **2009**, *11*, 2543.
- Scott, J. P.; Hammond, D. C.; Beck, E. M.; Brands, K. M. *J. Tetrahedron Lett.* **2004**, *45*, 3345.
- Kuwano, R.; Kondo, Y.; Shirahama, T. *Org. Lett.* **2005**, *7*, 2973.
- Blessley, G.; Holden, P.; Walker, M.; Brown, J. M.; Gouverneur, V. *Org. Lett.* **2012**, *14*, 2754.
- Niwa, T.; Yorimitsu, H.; Oshima, K. *Tetrahedron.* **2009**, *65*, 1971.
- Guendel, W. H. *Z. Naturforsch., B Anorg. Chem., Org. Chem.* **1981**, *36B*, 1031.
- Mokhtary, M.; Lakouraj, M. M.; Niaki, M. R. *Phosphorus, Sulfur Silicon Relat. Elem.* **2012**, *187*, 321.
- Scholz, R.; Hellmann, G.; Rohs, S.; Raabe, G.; Runsink, J.; Oezdemir, D.; Luche, O.; Hess, T.; Giesen, A. W.; Atodiresi, J.; Lindner, H. J.; Gais, H.-J. *Eur. J. Org. Chem.* **2010**, *24*, 4559.

## NMR Spectra.

### (Benzylsulfonyl)benzene (3a)

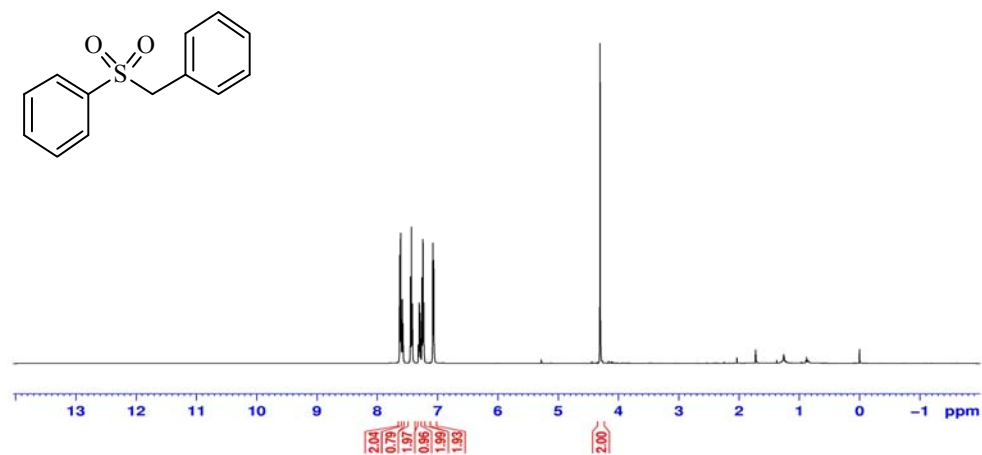

### (Benzylsulfonyl)benzene (3a)

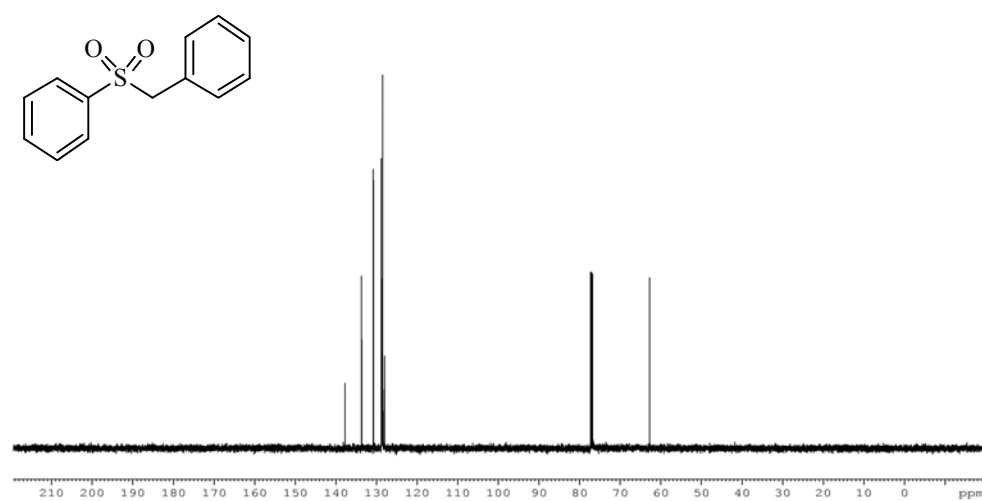

**1-Methyl-3-((phenylsulfonyl)methyl)benzene (3b)**

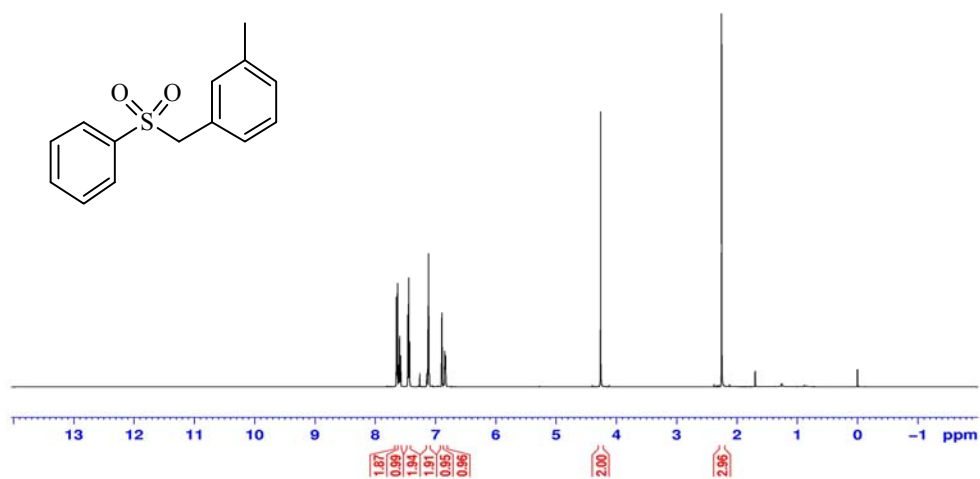

**1-Methyl-3-((phenylsulfonyl)methyl)benzene (3b)**

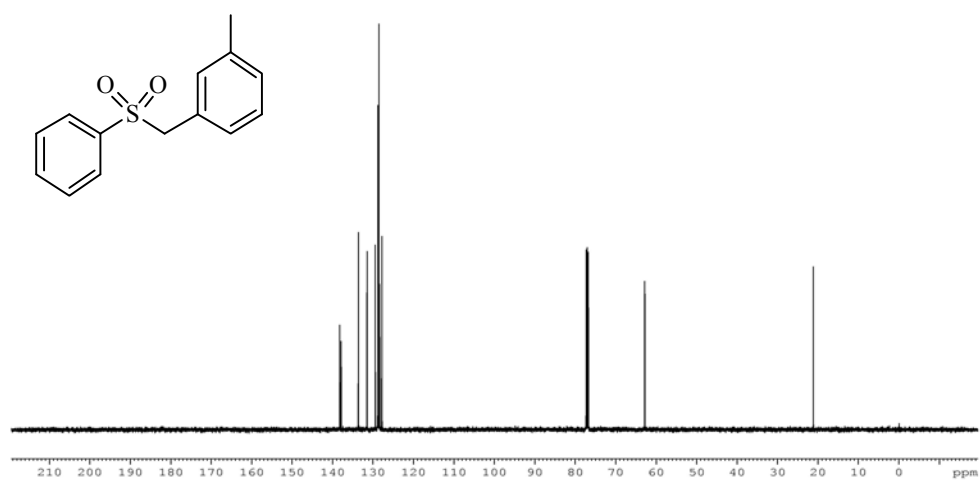

**1-Methoxy-4-((phenylsulfonyl)methyl)benzene (3c)**

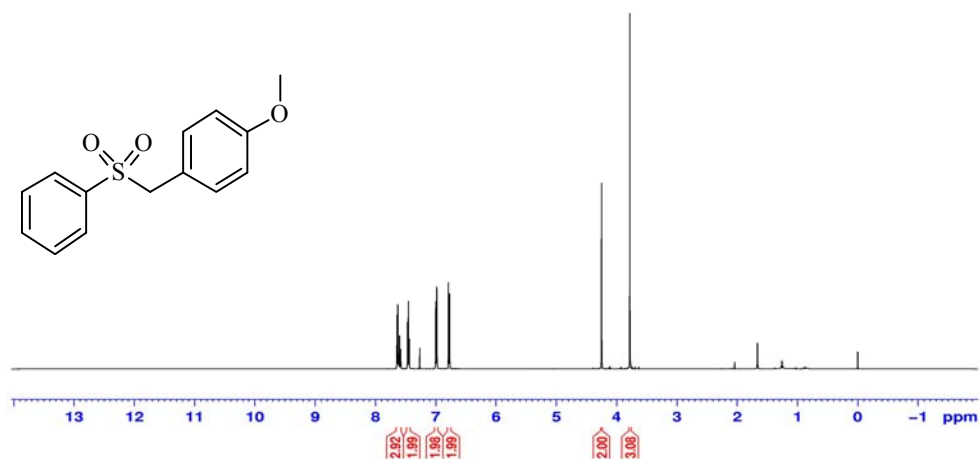

**1-Methoxy-4-((phenylsulfonyl)methyl)benzene (3c)**

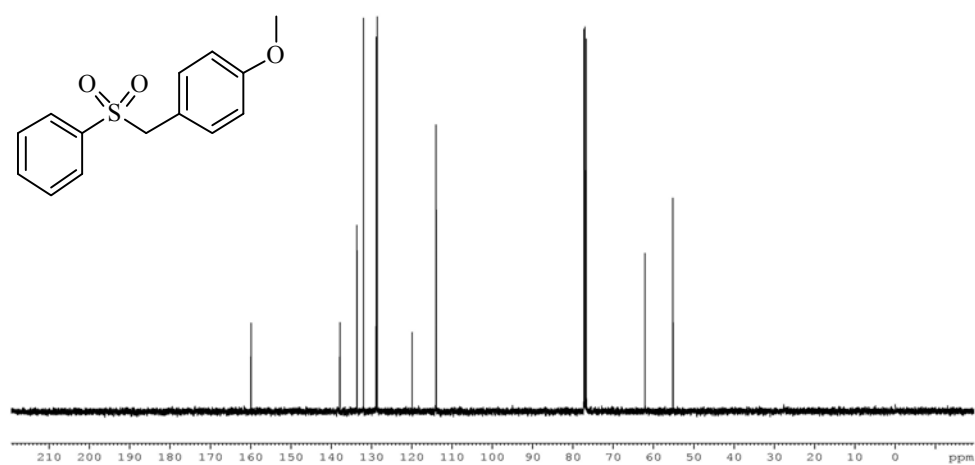

1-(*tert*-Butyl)-4-((phenylsulfonyl)methyl)benzene (3d)

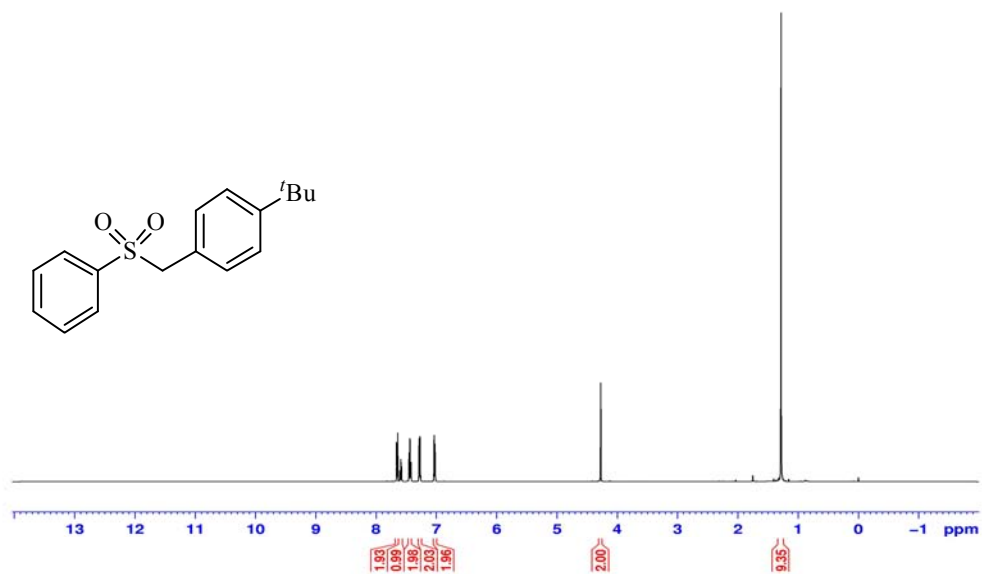

1-(*tert*-Butyl)-4-((phenylsulfonyl)methyl)benzene (3d)

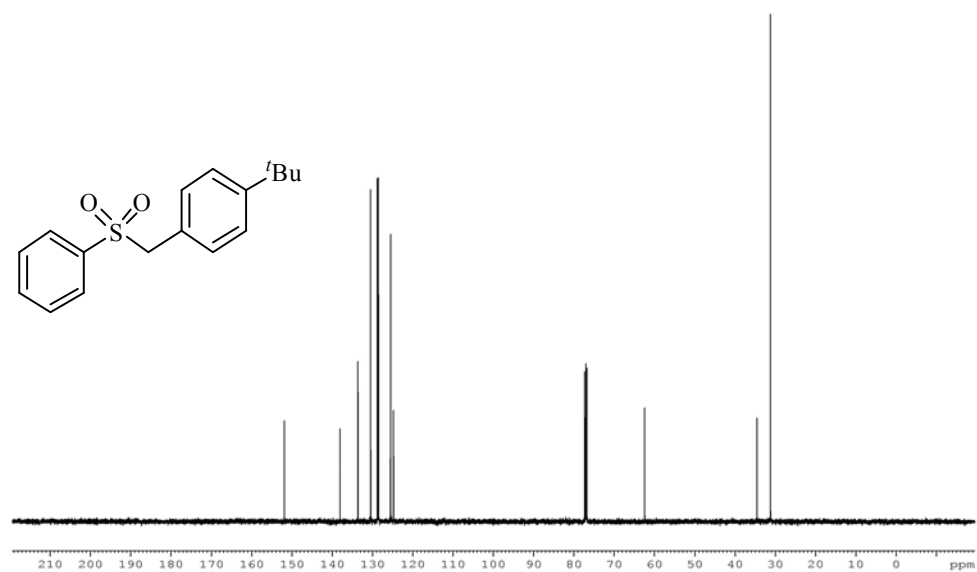

**1-Fluoro-4-((phenylsulfonyl)methyl)benzene (3e)**

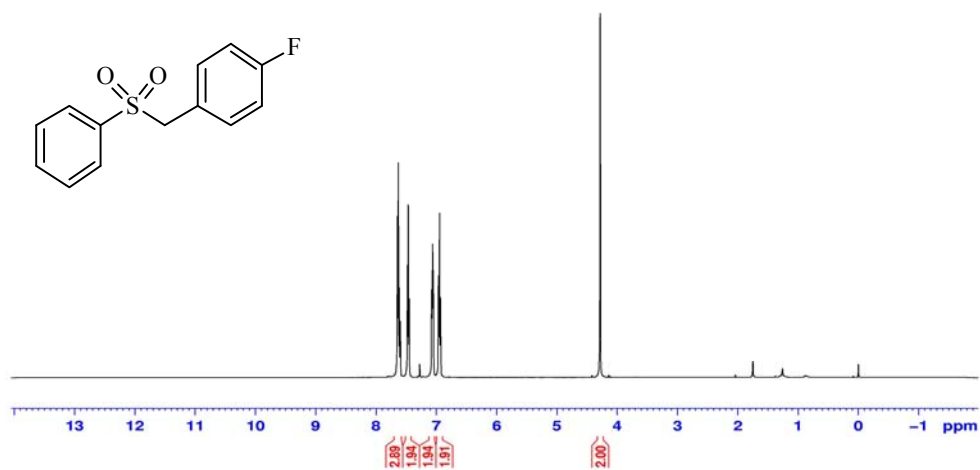

**1-Fluoro-4-((phenylsulfonyl)methyl)benzene (3e)**

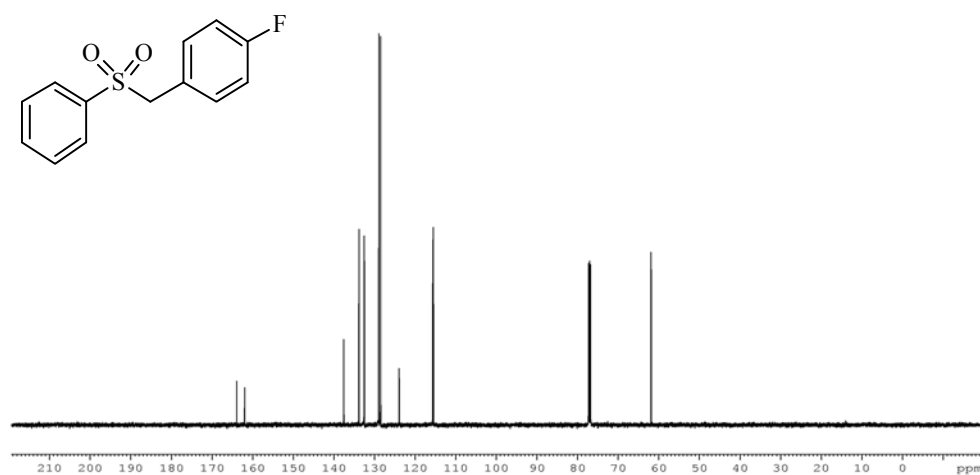

**1-Chloro-4-((phenylsulfonyl)methyl)benzene (3f)**

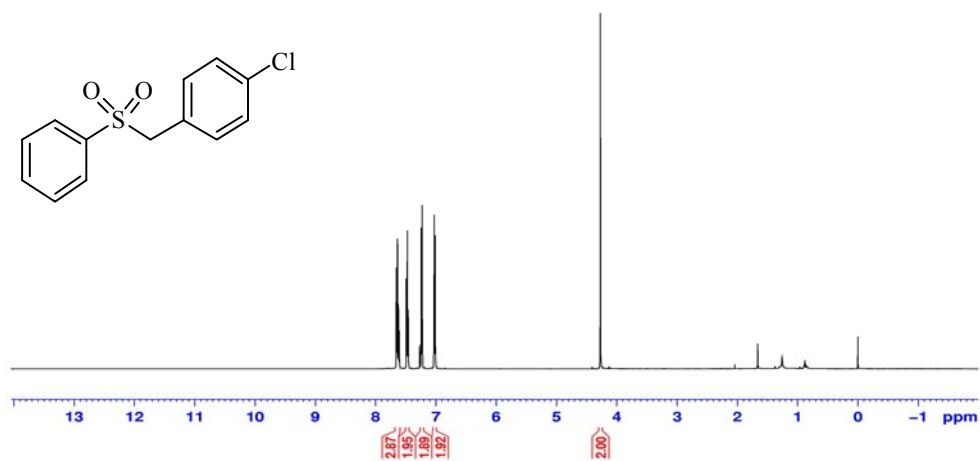

**1-Chloro-4-((phenylsulfonyl)methyl)benzene (3f)**

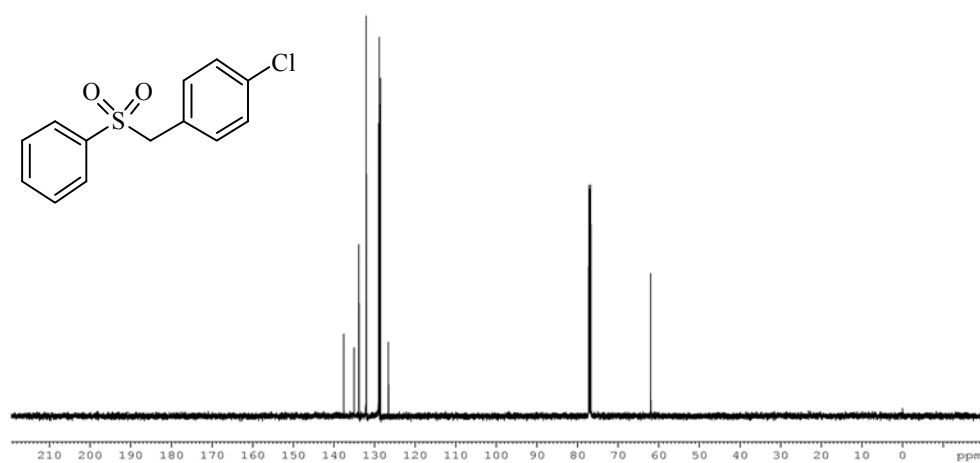



1-((Phenylsulfonyl)methyl)-3-(trifluoromethyl)benzene

(3g)

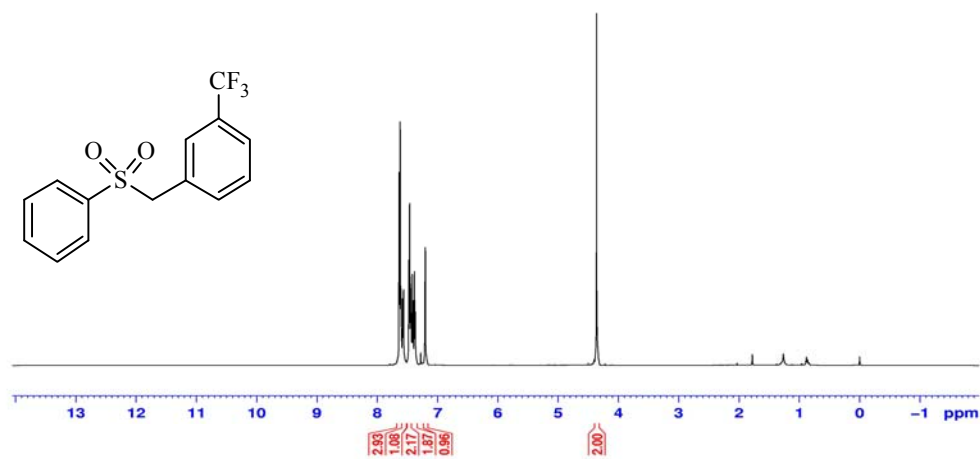

1-((Phenylsulfonyl)methyl)-3-(trifluoromethyl)benzene

(3g)

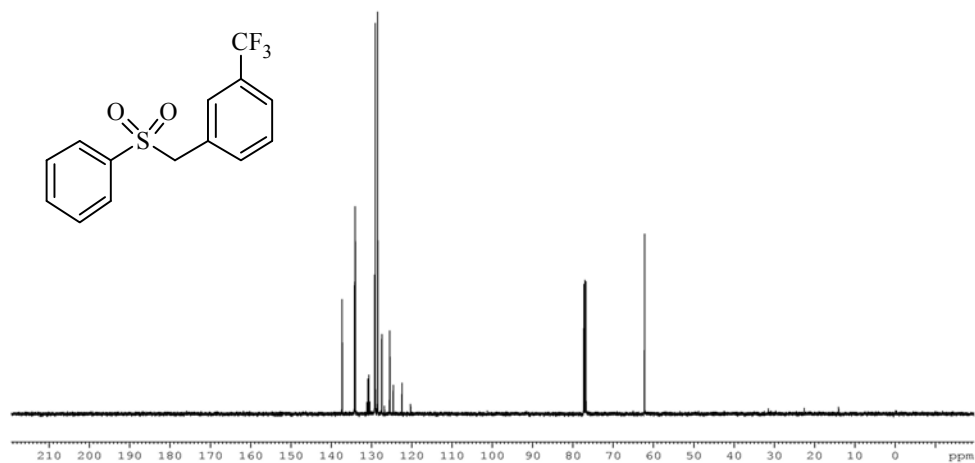

**1-((Phenylsulfonyl)methyl)naphthalene (3h)**

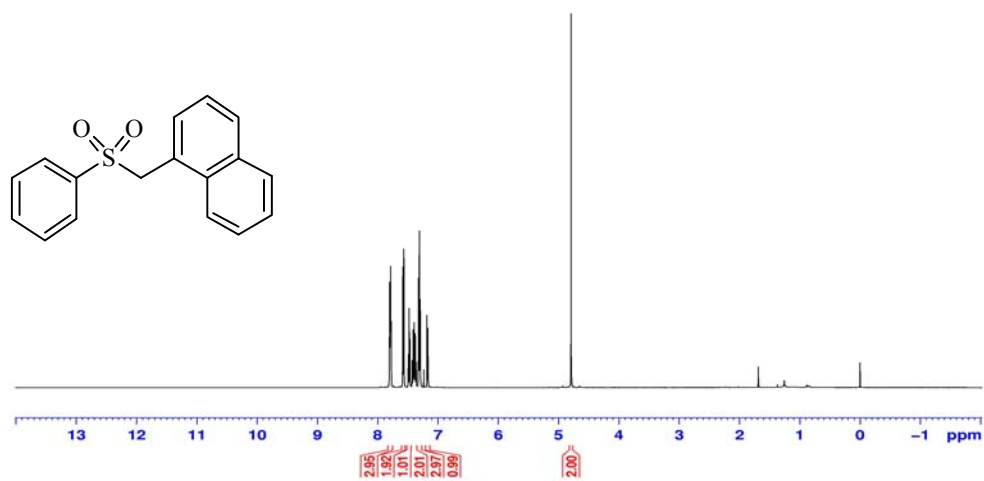

**1-((Phenylsulfonyl)methyl)naphthalene (3h)**

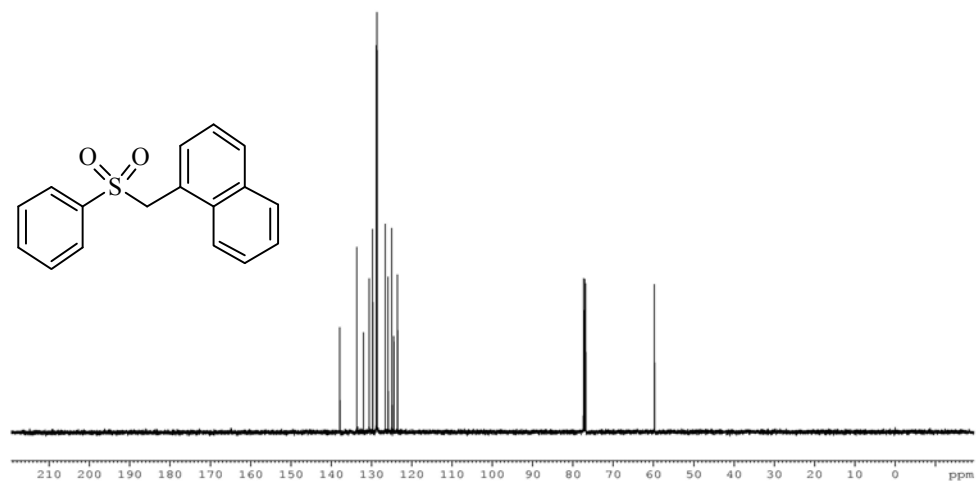

**1-(Benzylsulfonyl)-2-methylbenzene (4b)**

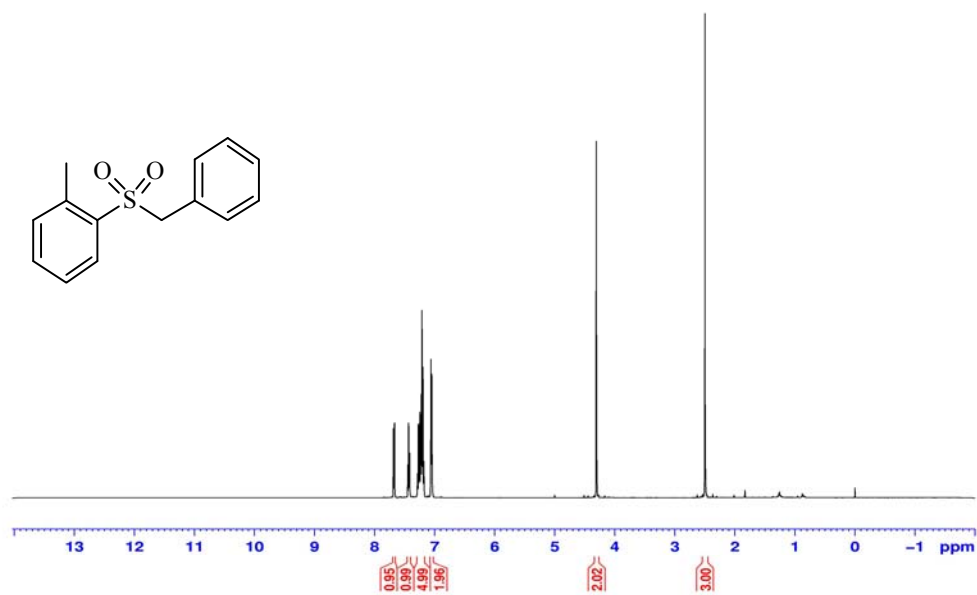

**1-(Benzylsulfonyl)-2-methylbenzene (4b)**

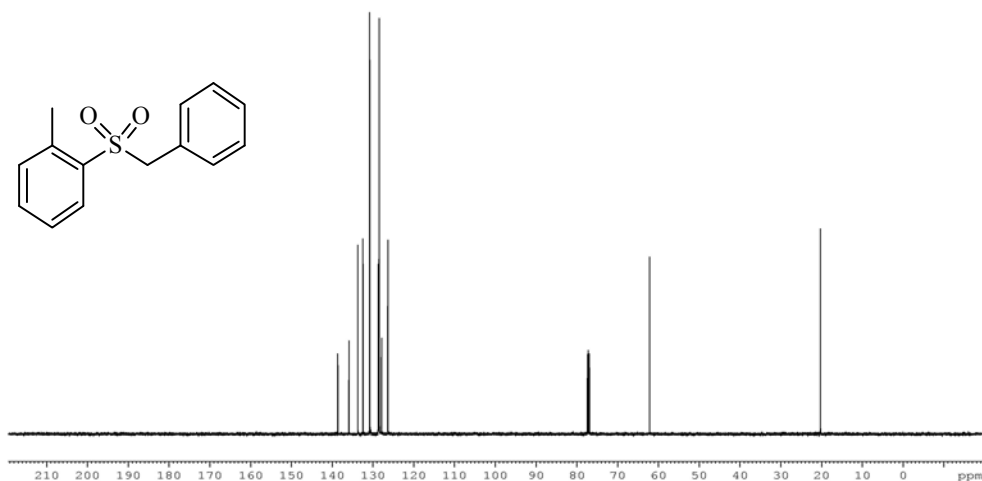

**1-(Benzylsulfonyl)-3-methoxybenzene (4c)**

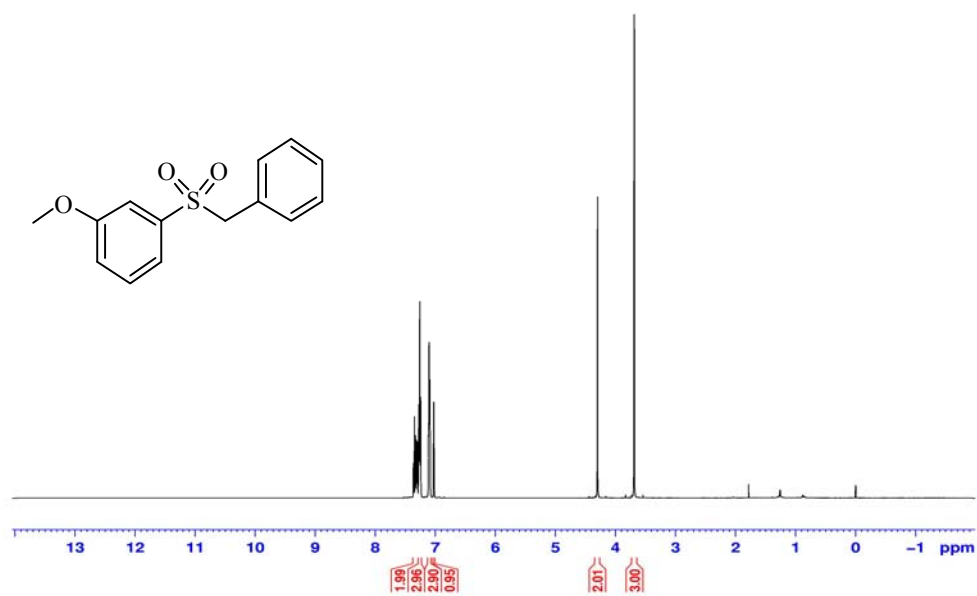

**1-(Benzylsulfonyl)-3-methoxybenzene (4c)**

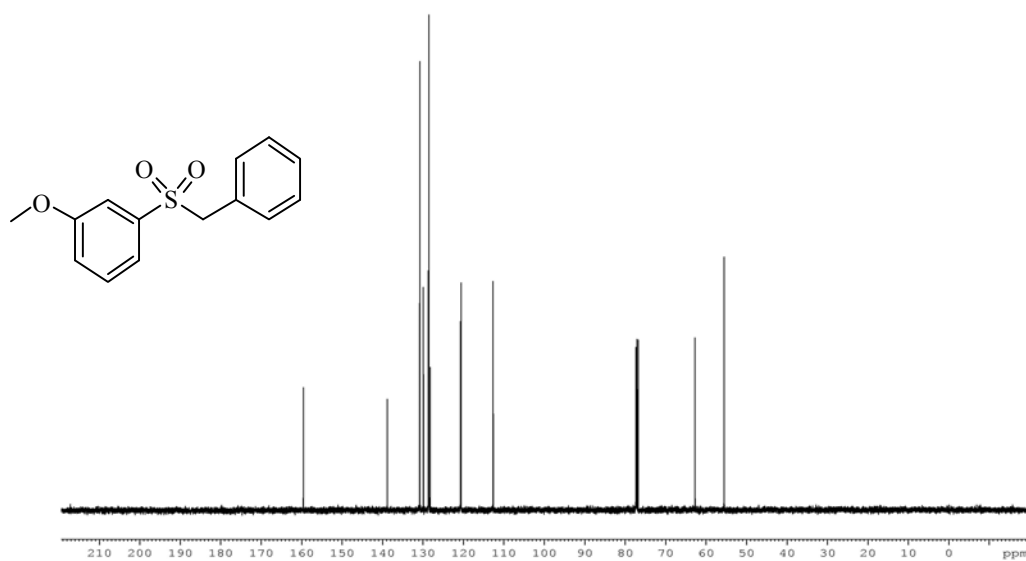

### 1-(Benzylsulfonyl)-4-methoxybenzene (4d)

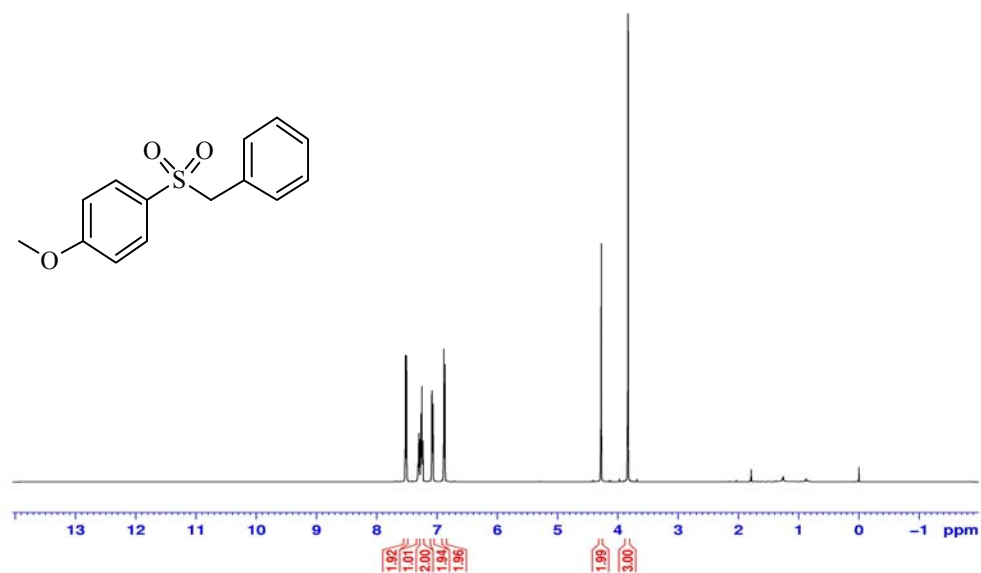

### 1-(Benzylsulfonyl)-4-methoxybenzene (4d)

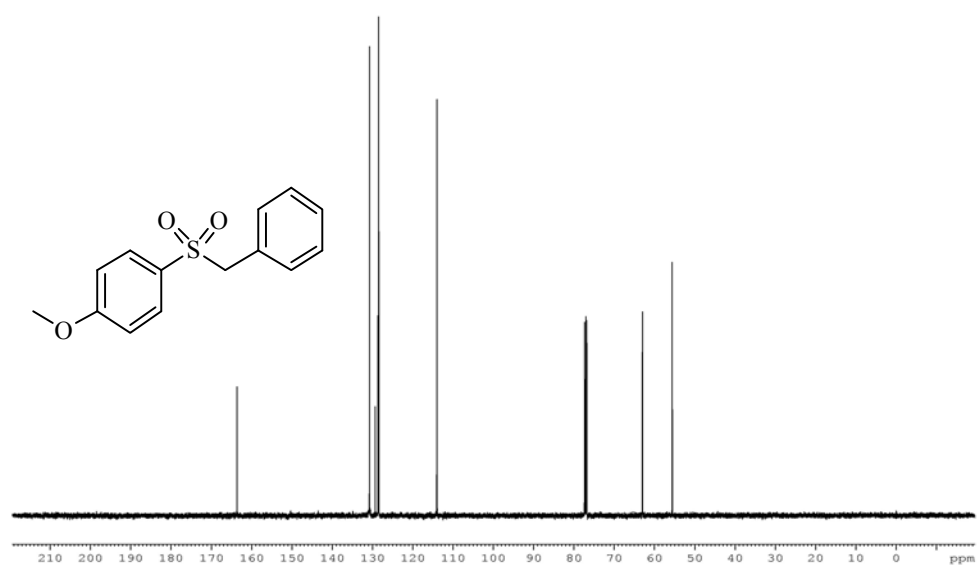

1-(Benzylsulfonyl)-4-fluorobenzene (4e)

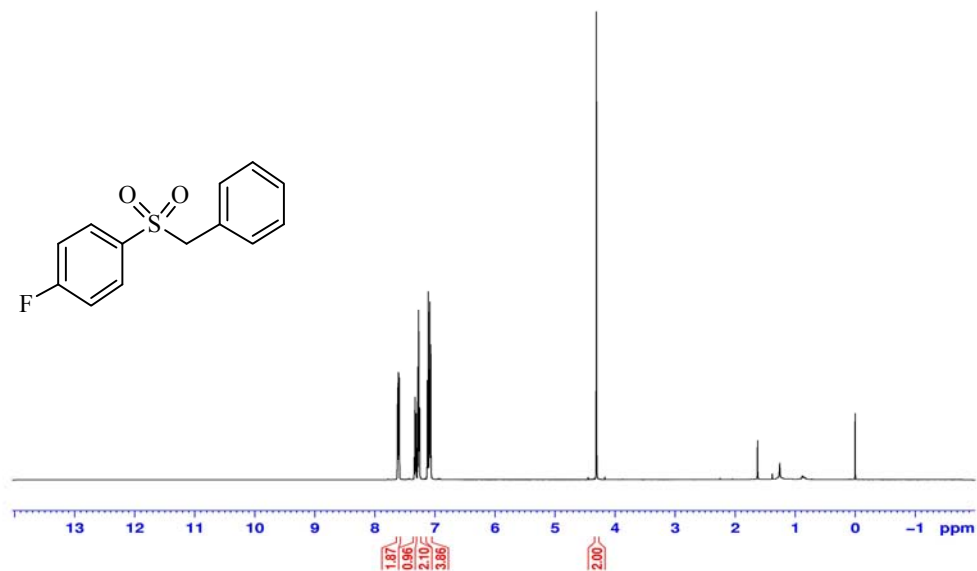

1-(Benzylsulfonyl)-4-fluorobenzene (4e)

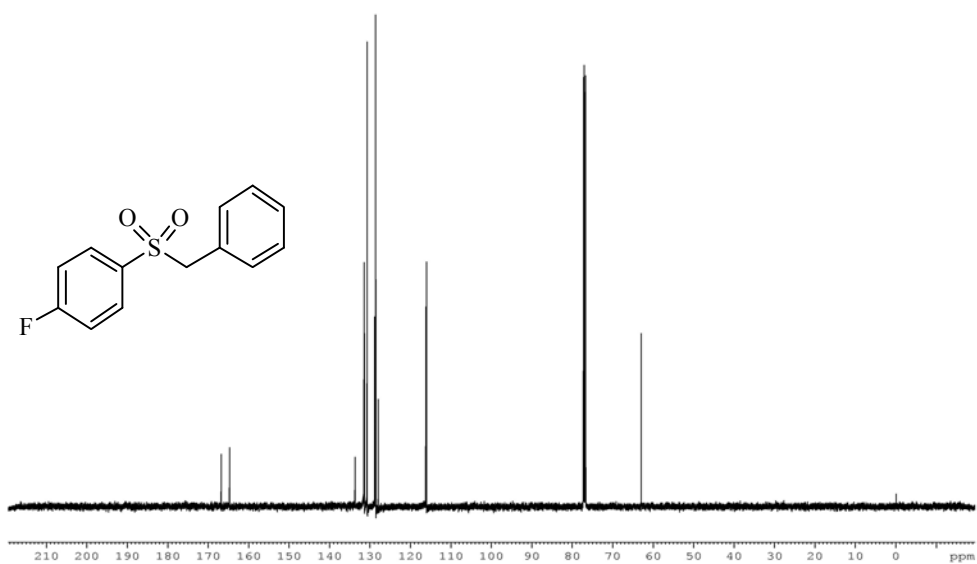

**1-(Benzylsulfonyl)-4-chlorobenzene (4f)**

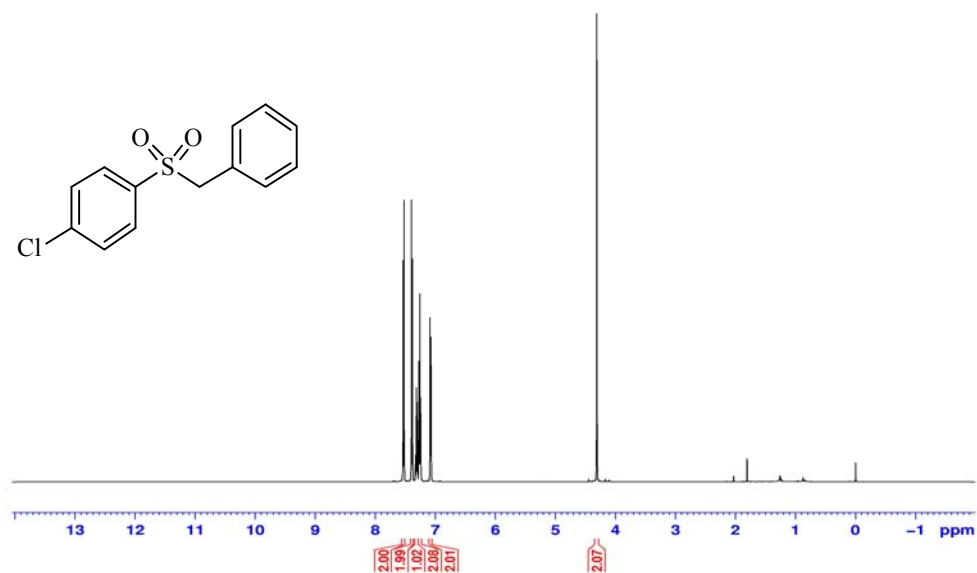

**1-(Benzylsulfonyl)-4-chlorobenzene (4f)**

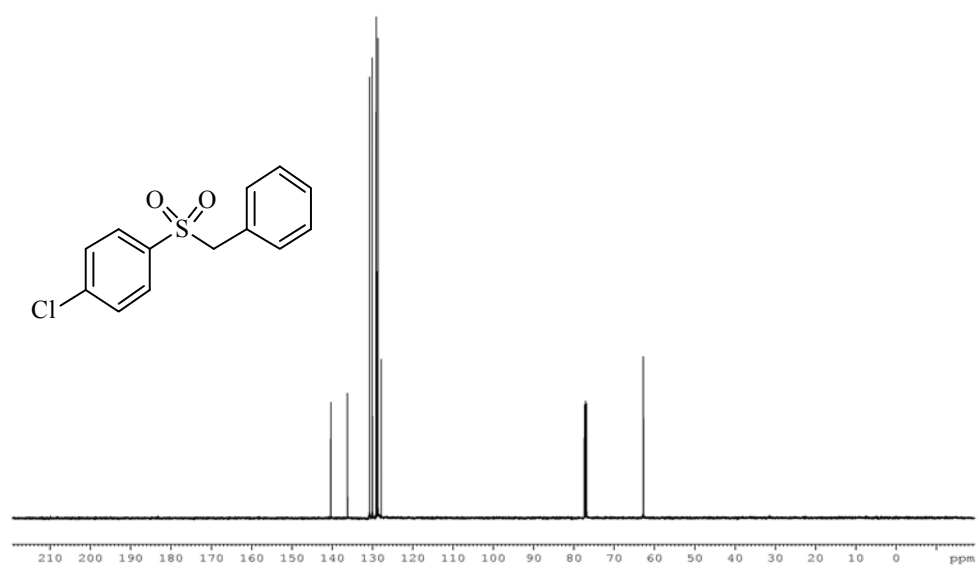

**1-(Benzylsulfonyl)-4-(trifluoromethyl)benzene (4g)**

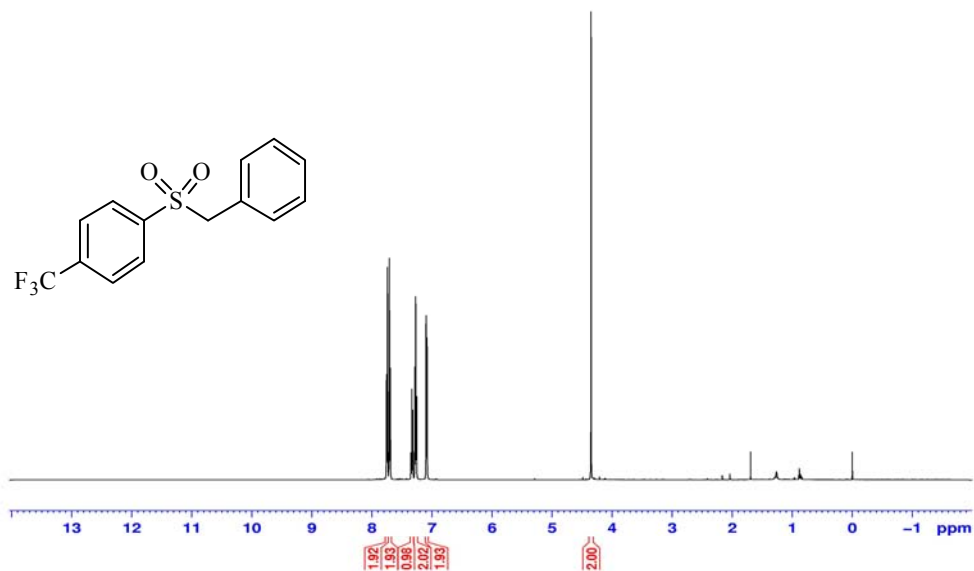

**1-(Benzylsulfonyl)-4-(trifluoromethyl)benzene (4g)**

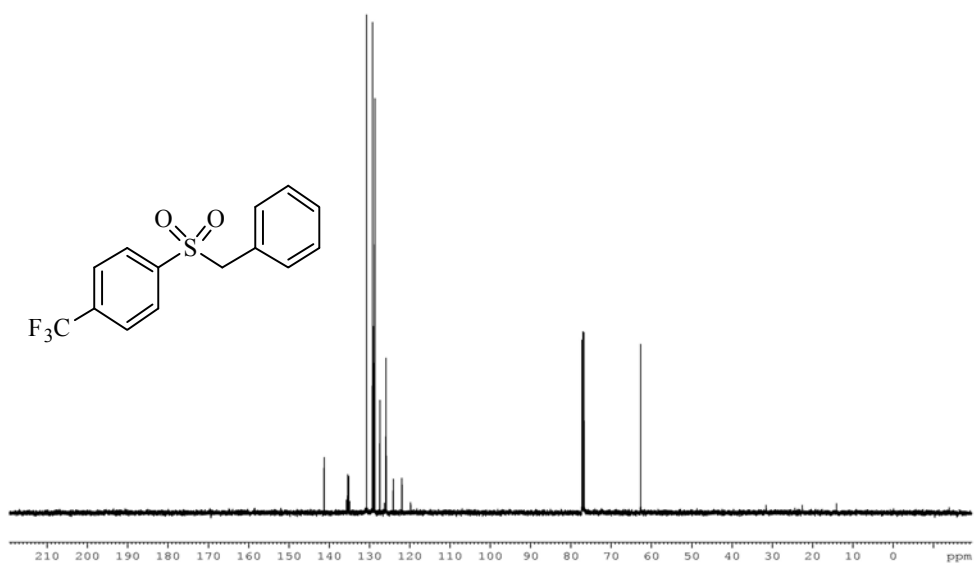



**1-(Benzylsulfonyl)naphthalene (4h)**

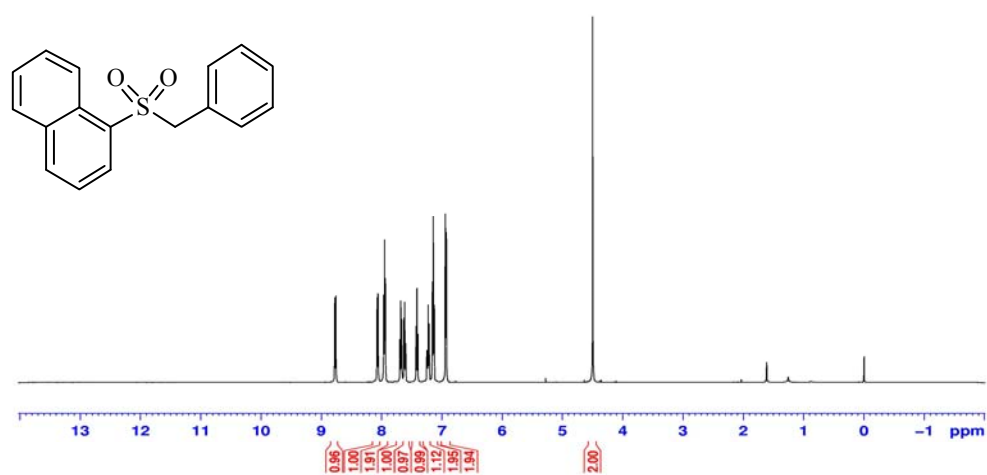

**1-(Benzylsulfonyl)naphthalene (4h)**

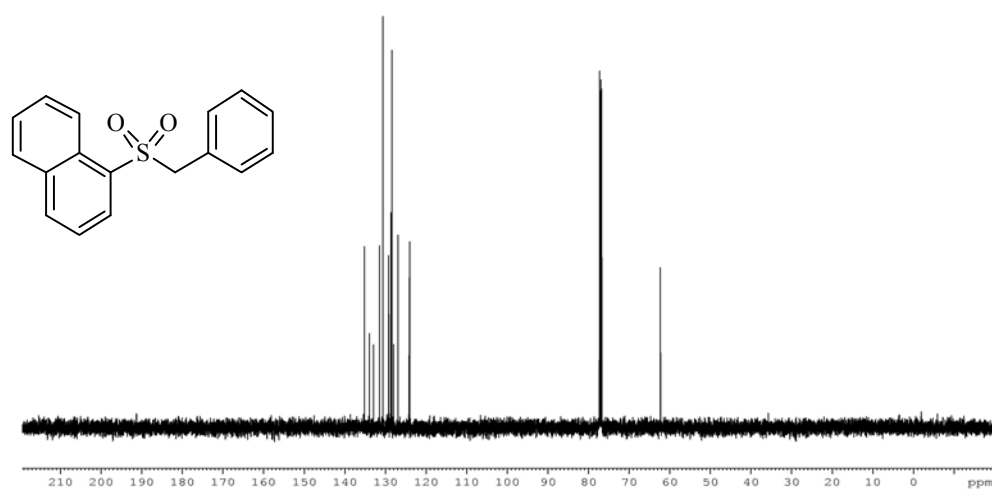

3-(Benzylsulfonyl)pyridine (4i)

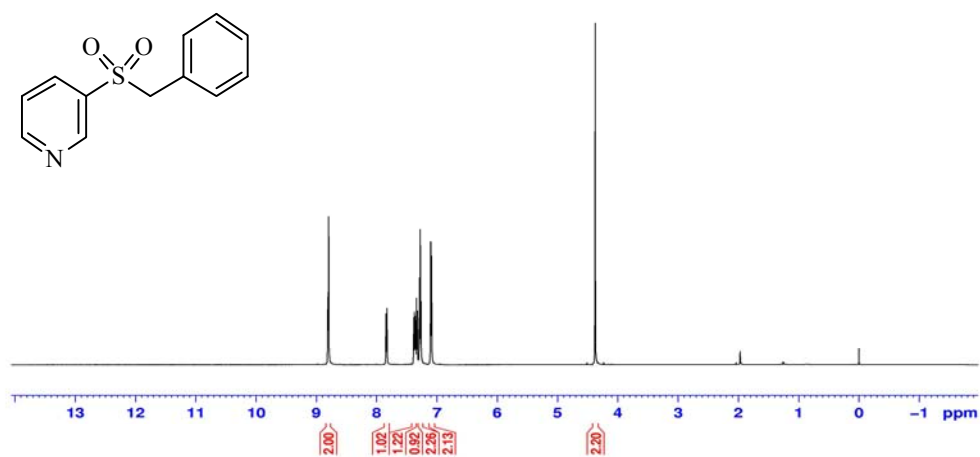

3-(Benzylsulfonyl)pyridine (4i)

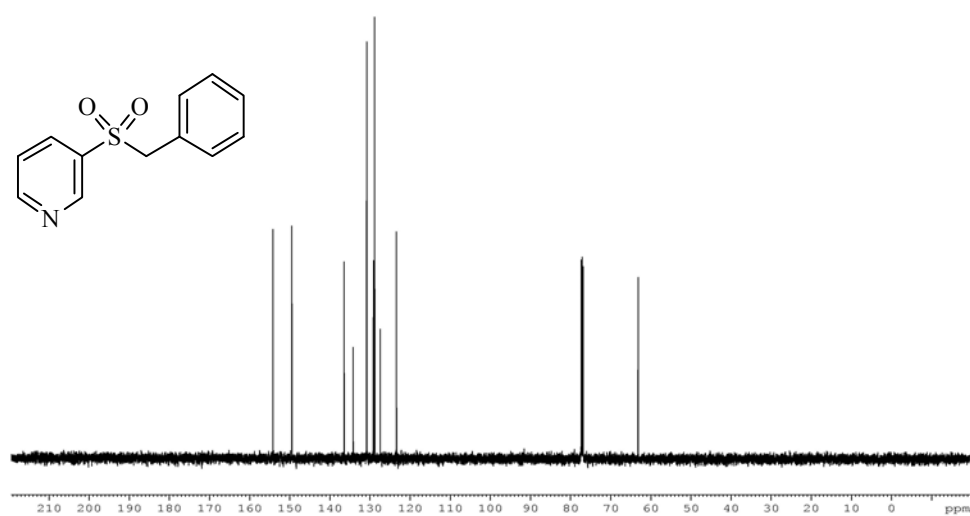

**((Cyclohexylsulfonyl)methyl)benzene (4j)**

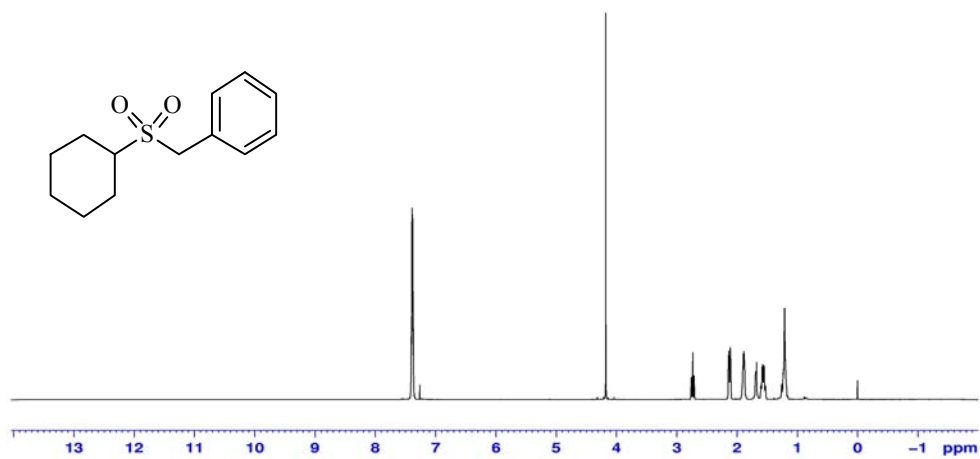

**((Cyclohexylsulfonyl)methyl)benzene (4j)**

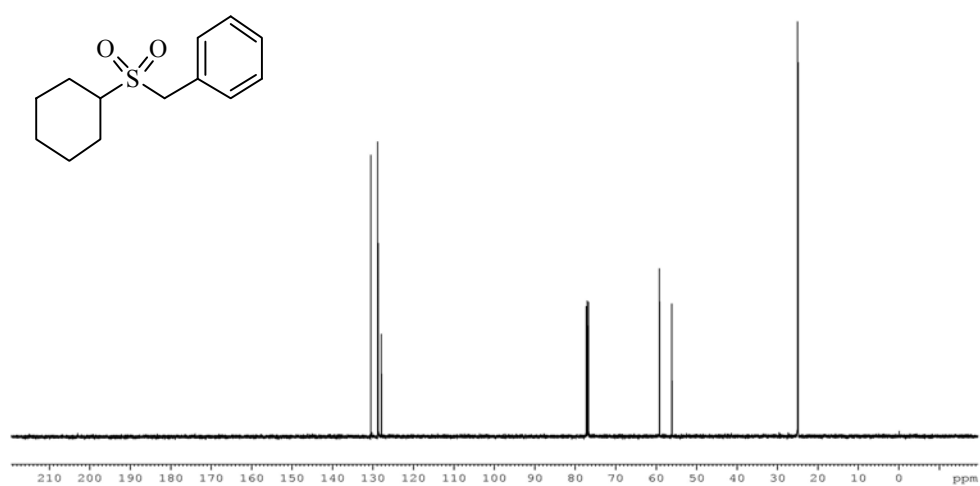

**((*tert*-Butylsulfonyl)methyl)benzene (4k)**

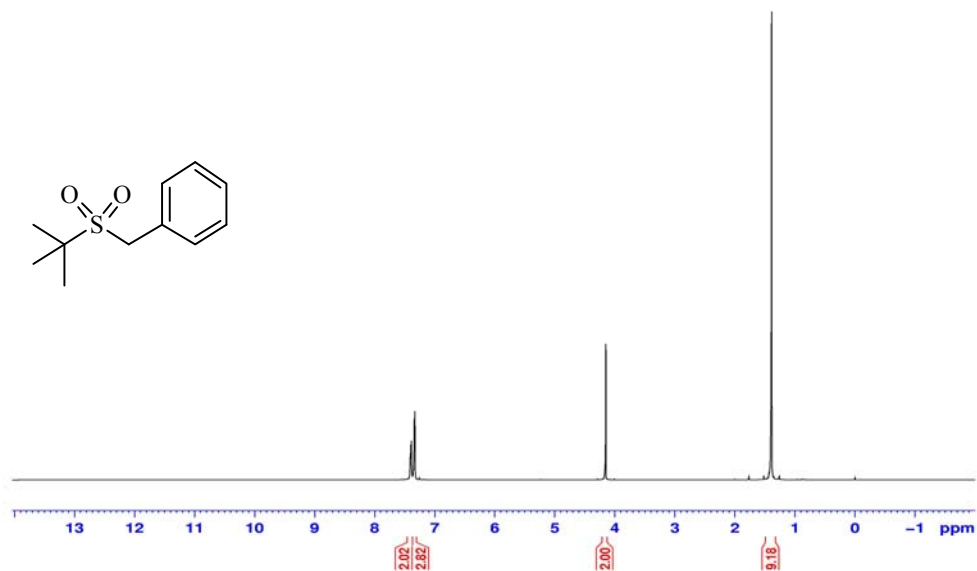

**((*tert*-Butylsulfonyl)methyl)benzene (4k)**

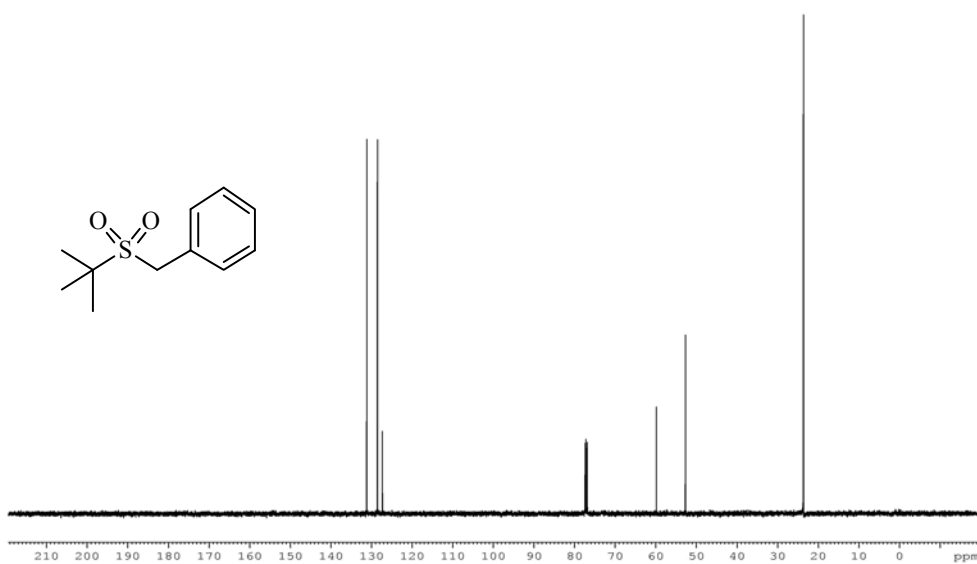

1-(*tert*-Butyl)-4-(phenyl(phenylsulfonyl)methyl)benzene (5a)

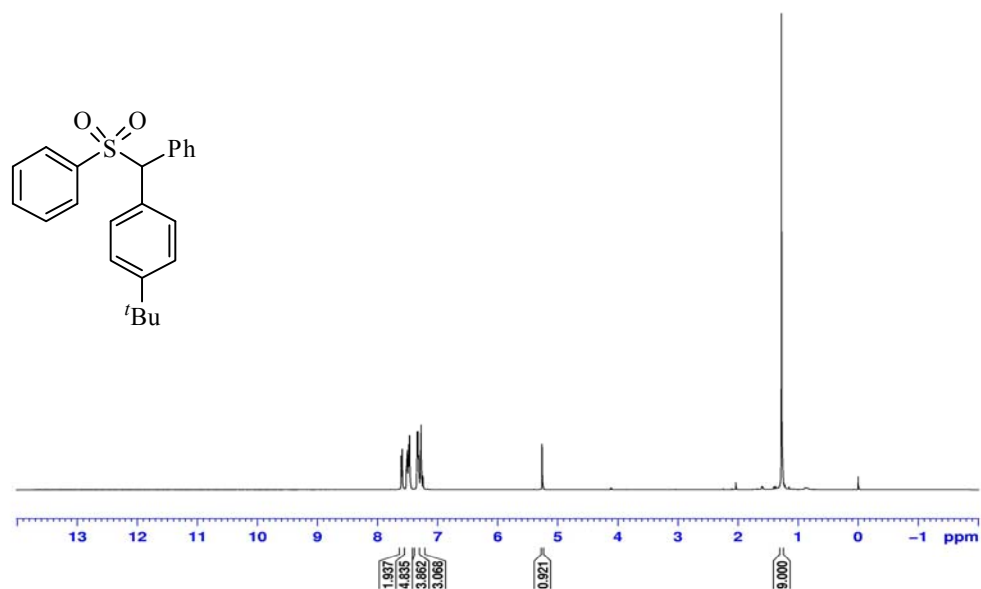

1-(*tert*-Butyl)-4-(phenyl(phenylsulfonyl)methyl)benzene (5a)

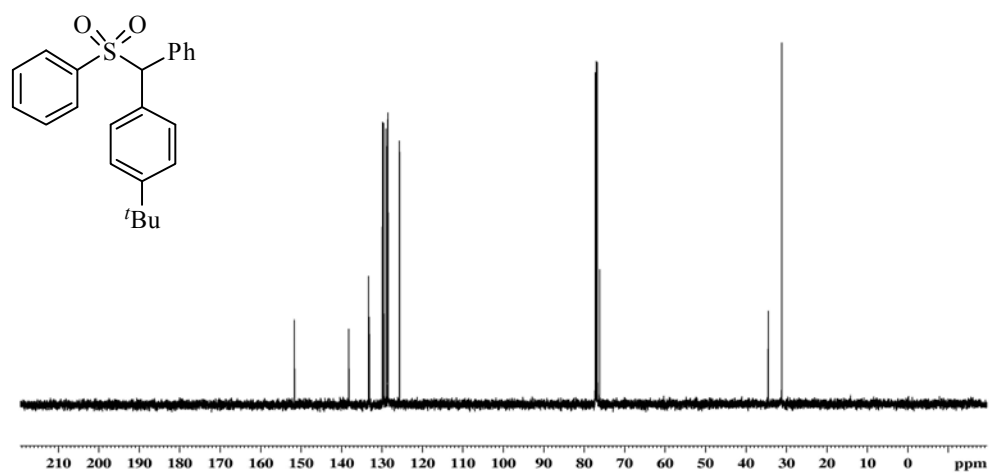

Supplement: Supplementary file 1 [file 4069672]
